# Supplementary material for: Phytochemicals of Apple Pomace as Prospect Bio-Fungicide Agents against Mycotoxigenic Fungal Species—In Vitro Experiments
Source: PubMed Central journal article supplement (PMC6628436; doi:10.3390/toxins11060361), 2019-06-20
Supplement: toxins-11-00361-s001.pdf [file toxins-11-00361-s001.pdf]

# Supplementary Materials: Phytochemicals of Apple Pomace as Prospect Bio-Fungicide Agents against Mycotoxigenic Fungal Species – In Vitro Experiments

Marta Oleszek\*, Łukasz Pecio, Solomiia Kozachok, Żaneta Lachowska-Filipiuk, Karolina Oszust and Magdalena Frąć

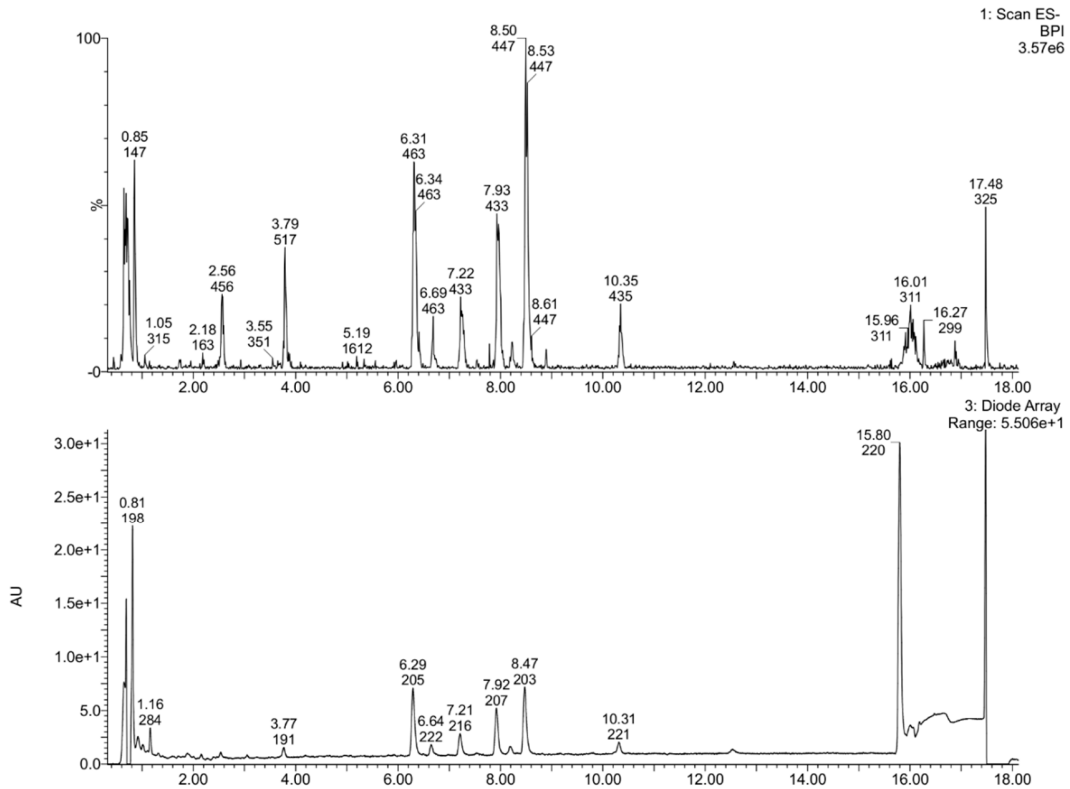

Figure S1. LC-DAD and MS/ES- chromatograms of crude extract from apple pomace.

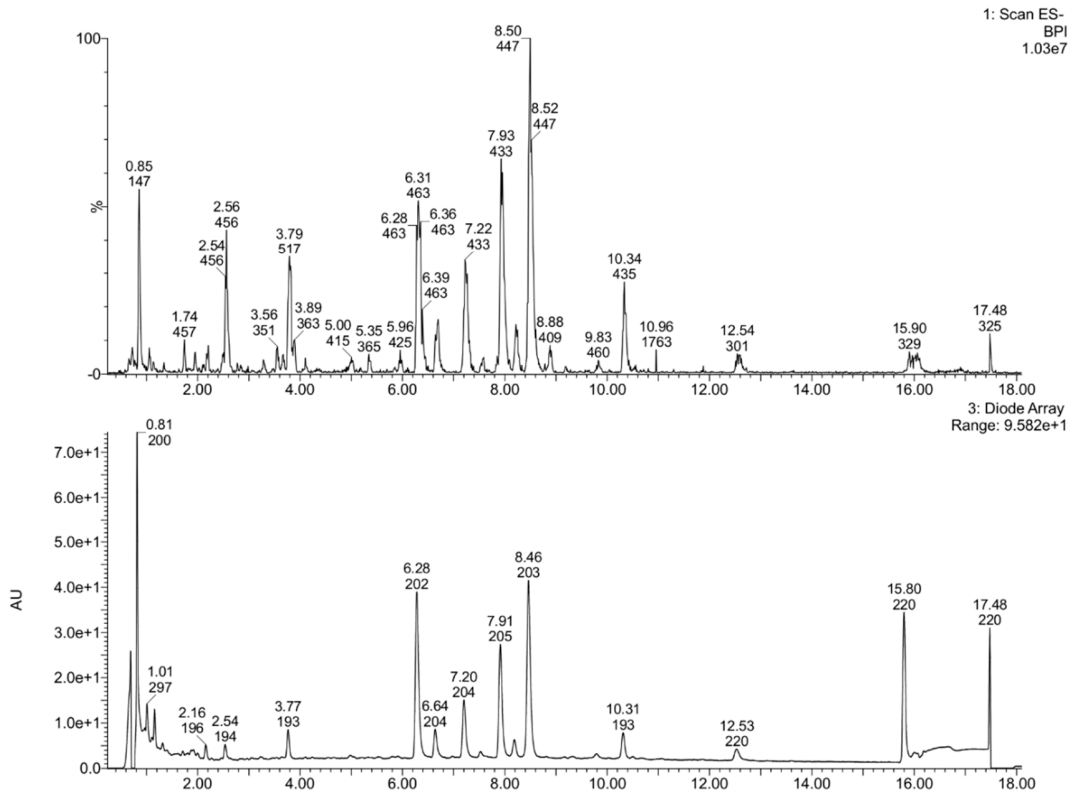

Figure S2. LC-DAD and MS/ES- chromatograms of purified extract from apple pomace.

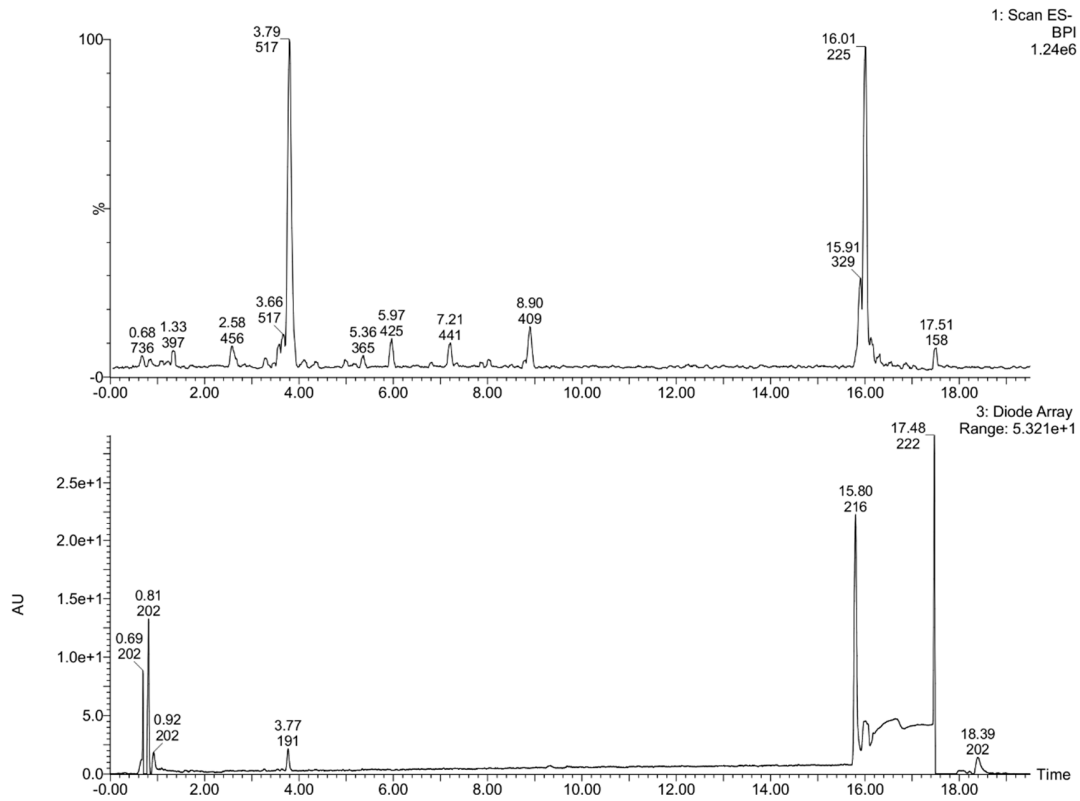

Figure S3. LC-DAD and MS/ES- chromatograms of fraction 1 from apple pomace.

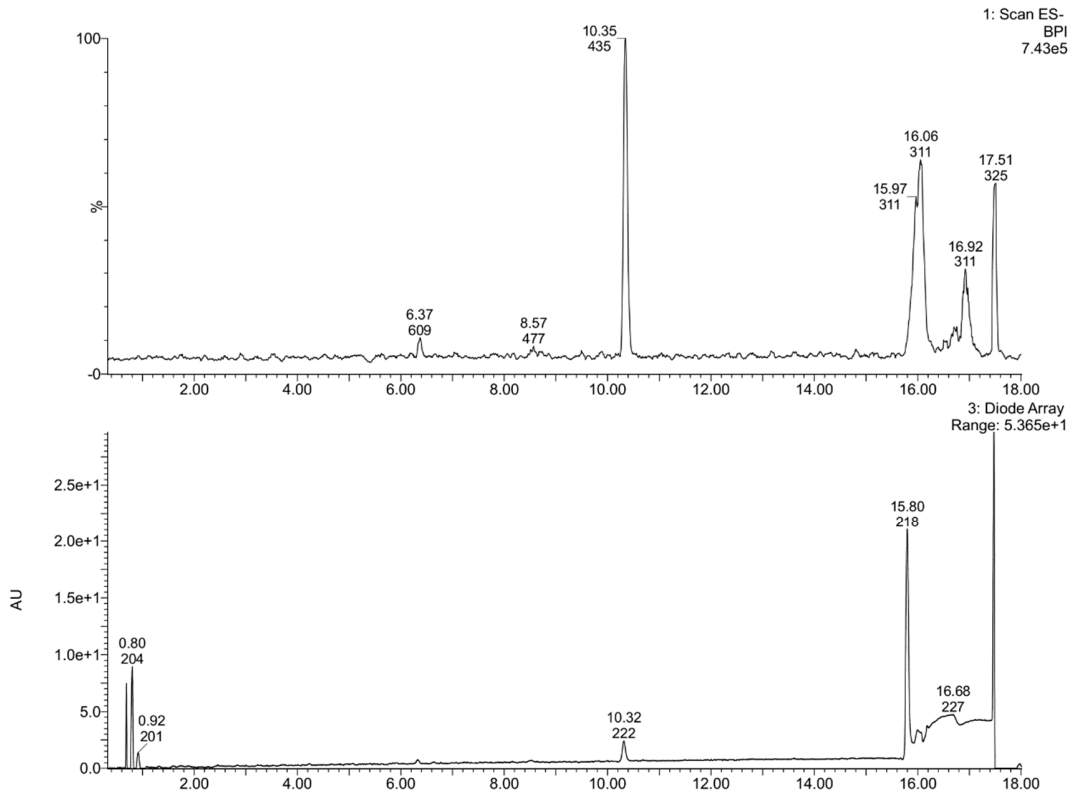

Figure S4. LC-DAD and MS/ES- chromatograms of fraction 4 from apple pomace.

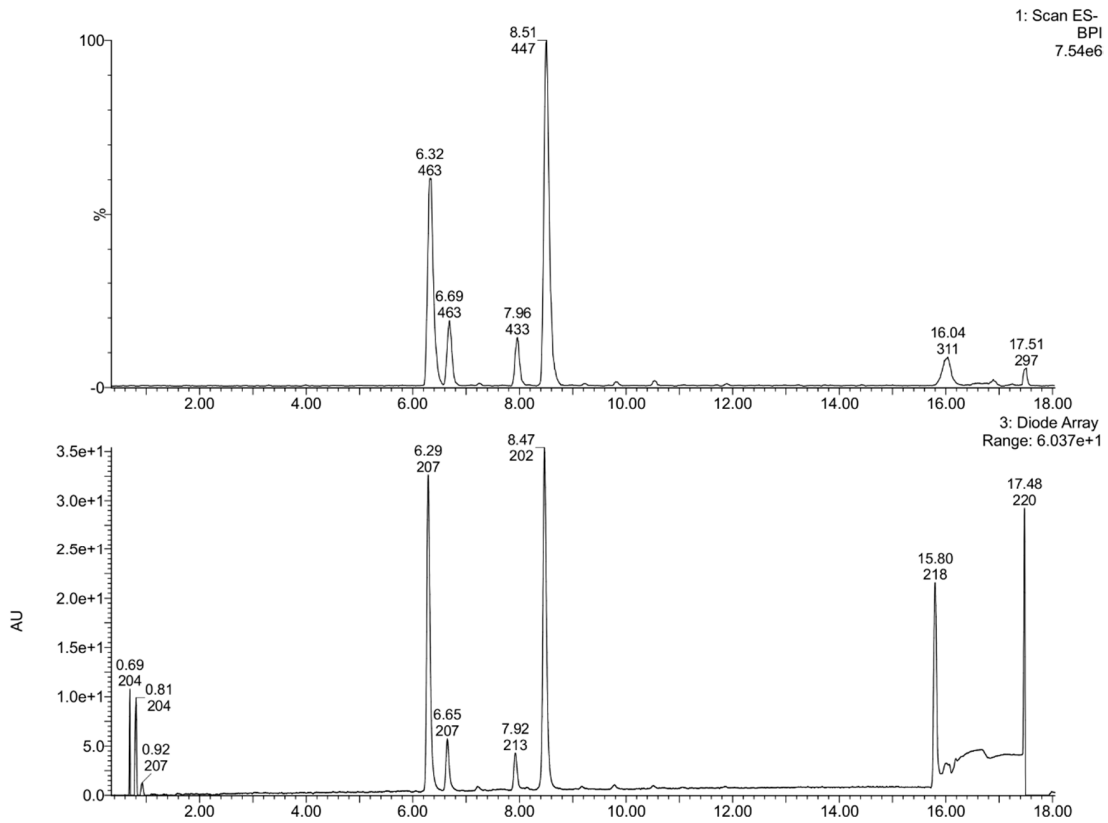

Figure S5. LC-DAD and MS/ES- chromatograms of fraction 5 from apple pomace.

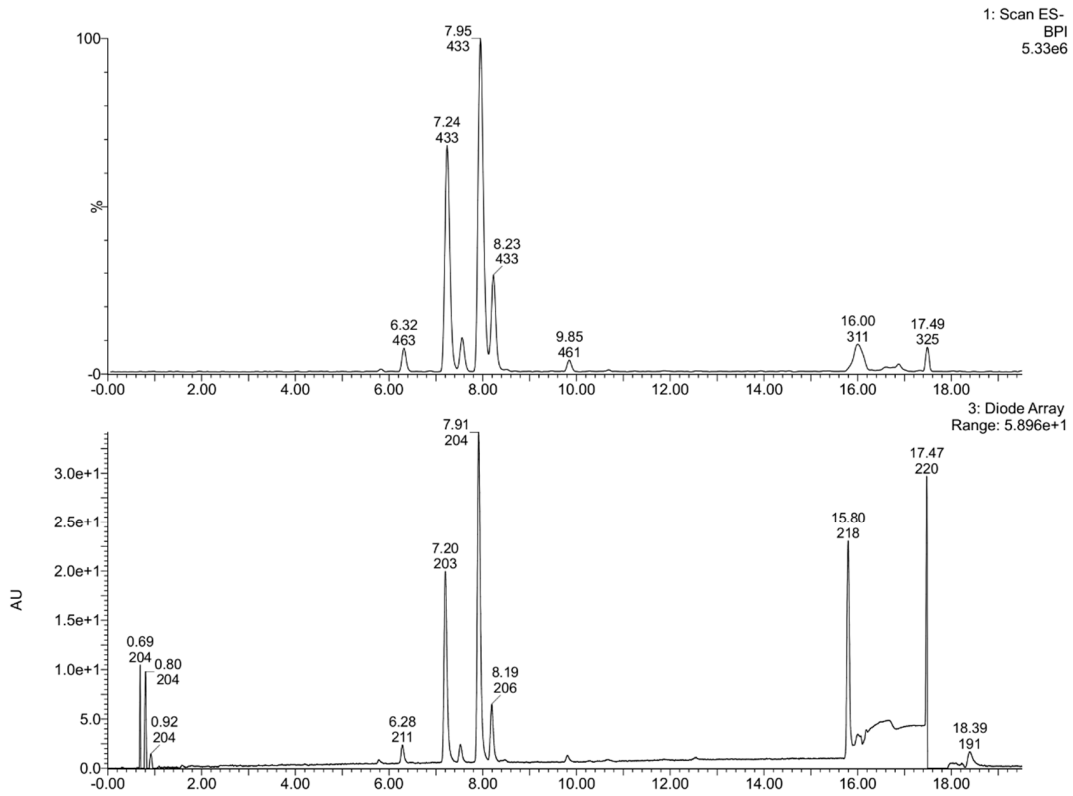

Figure S6. LC-DAD and MS/ES- chromatograms of fraction 6 from apple pomace.

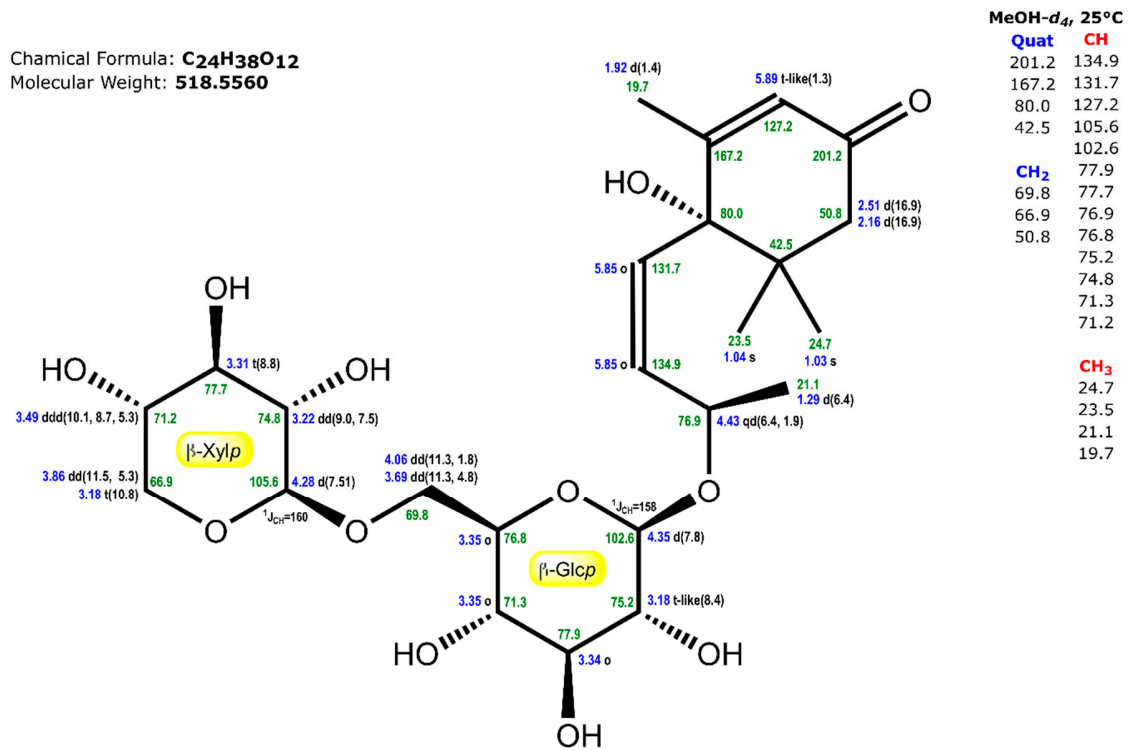

Figure S7. 1H and 13C NMR data of pinnatifidoside D.

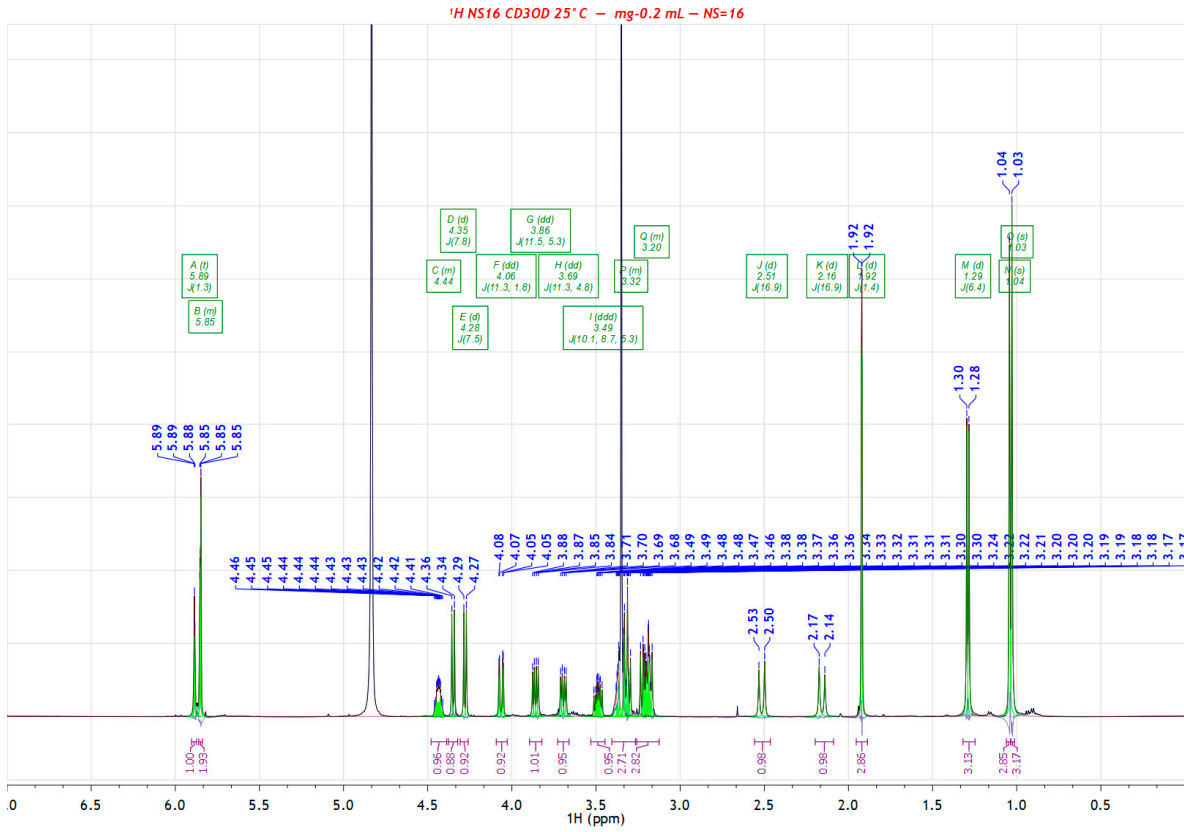

Figure S8. <sup>1</sup>H NMR (500 MHz) spectrum of pinnatifidoside D, in MeOH-d<sub>4</sub>, 25 °C.

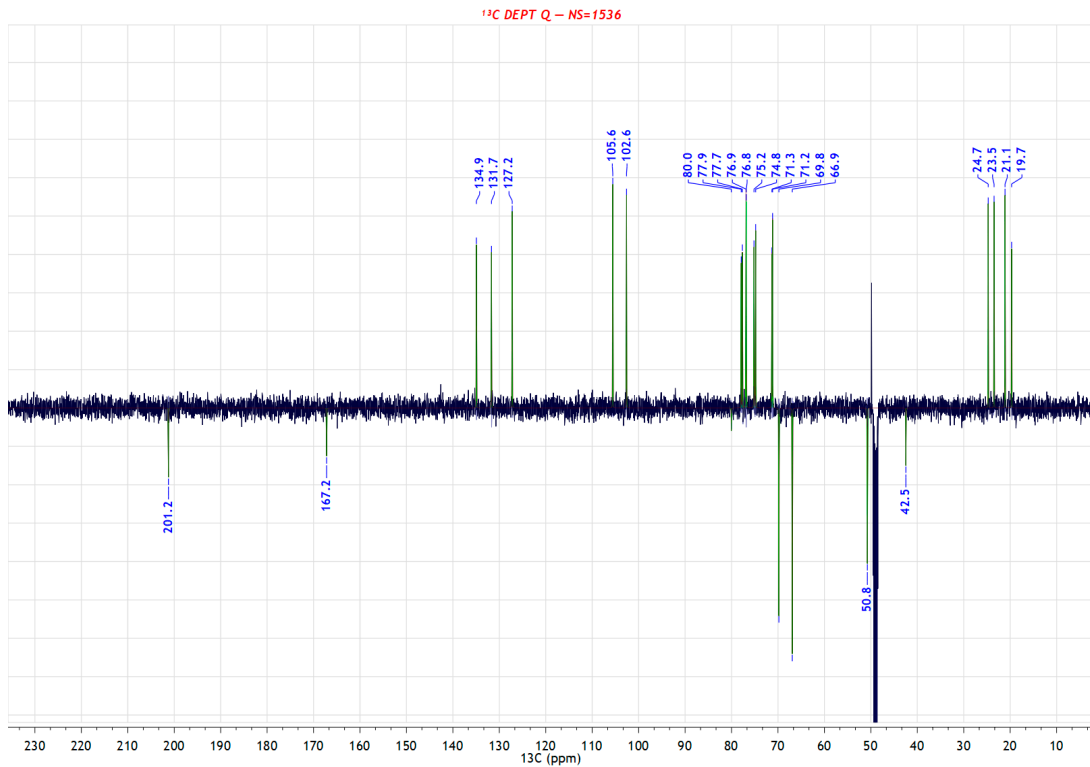

Figure S9. <sup>13</sup>C NMR (125 MHz) spectrum of pinnatifidoside D, in MeOH-d<sub>4</sub>, 25 °C.

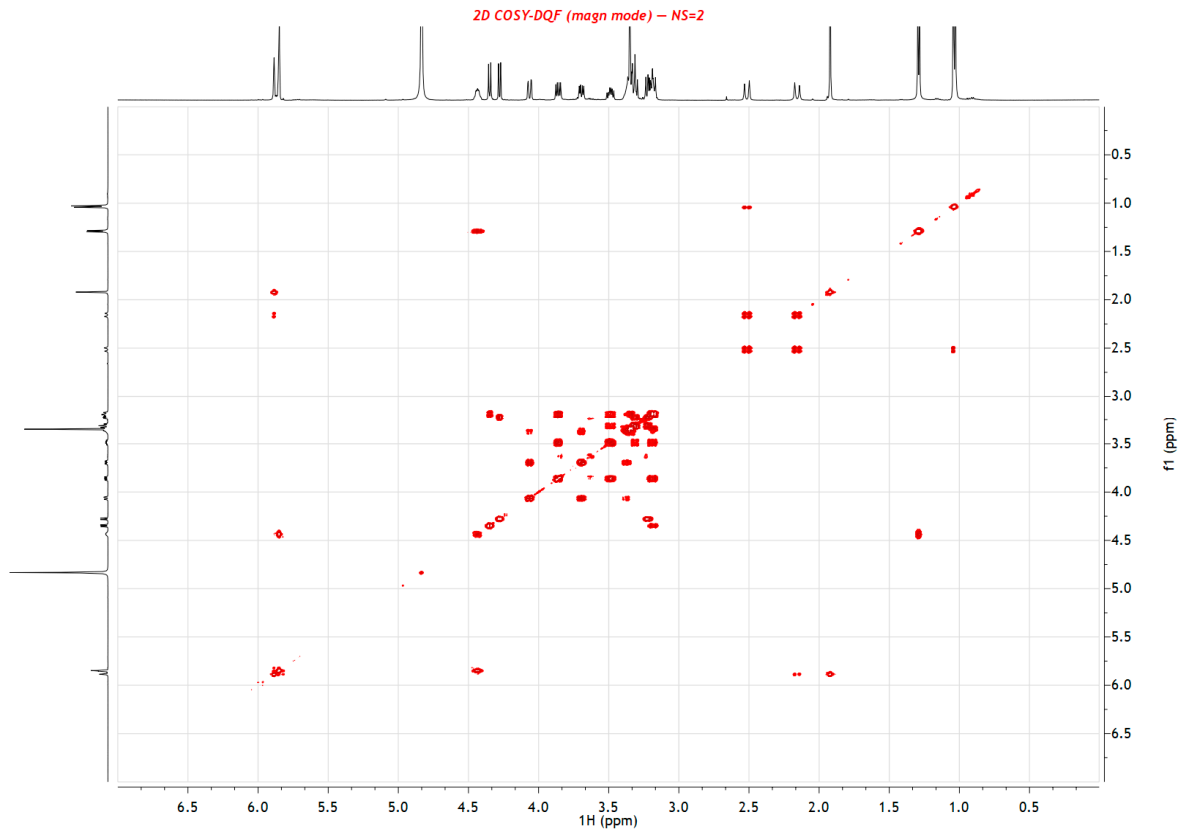

Figure S10.  $^1\text{H}$ - $^1\text{H}$  2D COSY NMR (500 MHz) spectrum of pinnatifidanoside D, in  $\text{MeOH-d}_4$ , 25 °C.

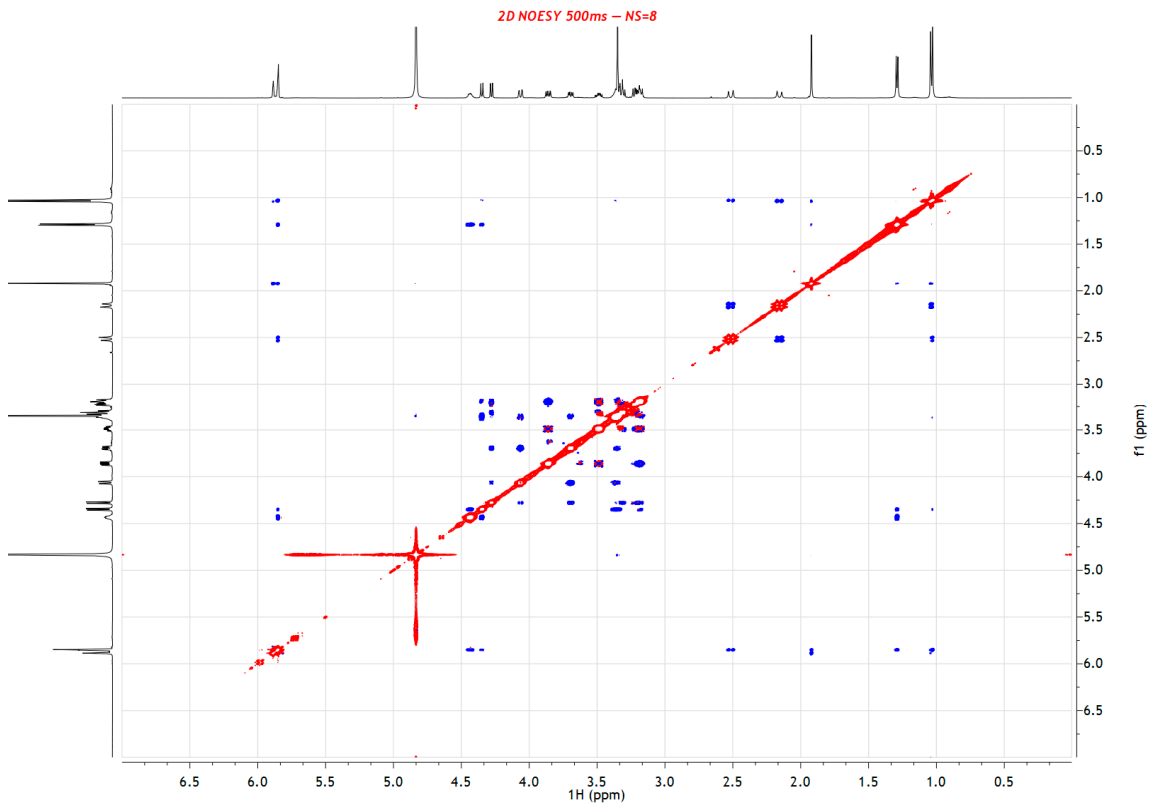

Figure S11.  $^1\text{H}$ - $^1\text{H}$  2D NOESY NMR (500 MHz) spectrum of pinnatifidanoside D, in  $\text{MeOH-d}_4$ , 25 °C.

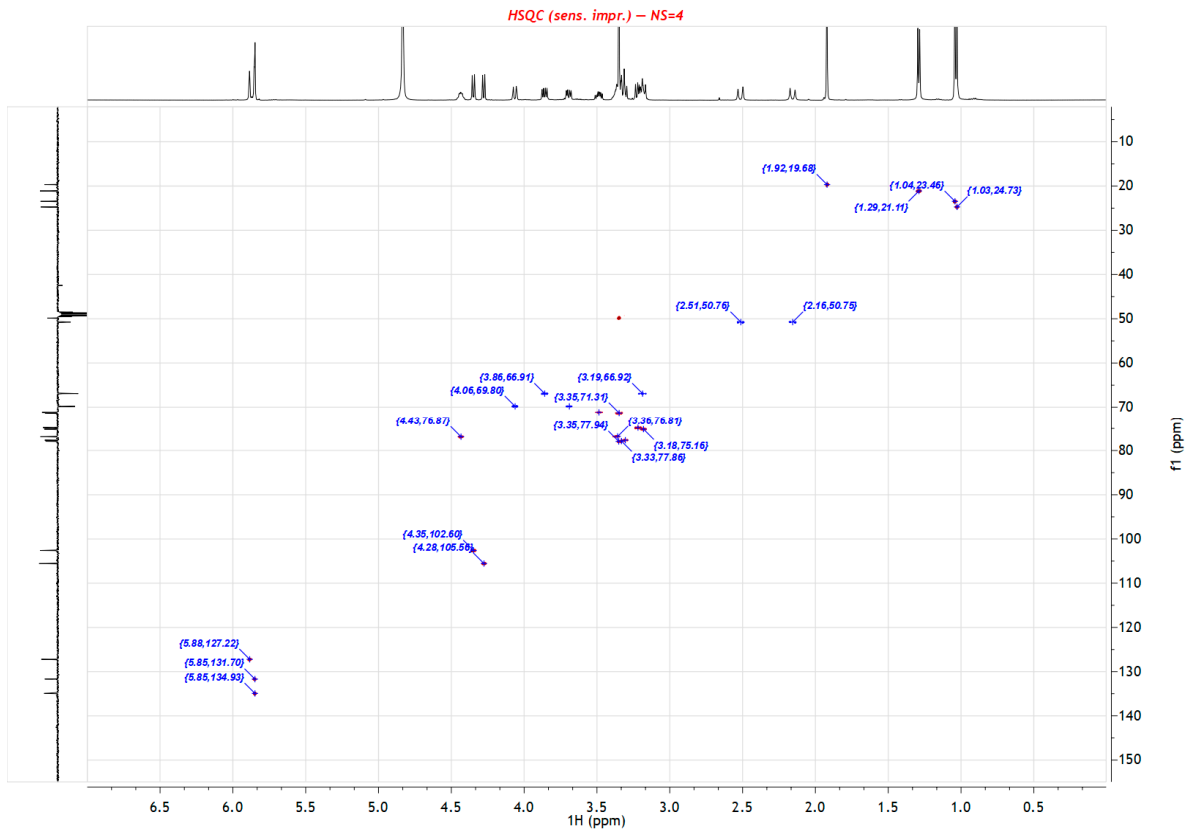

Figure S12.  $^1\text{H}$ - $^{13}\text{C}$  HSQC NMR (500 MHz) spectrum of pinnatifidoside D, in MeOH- $d_4$ , 25 °C.

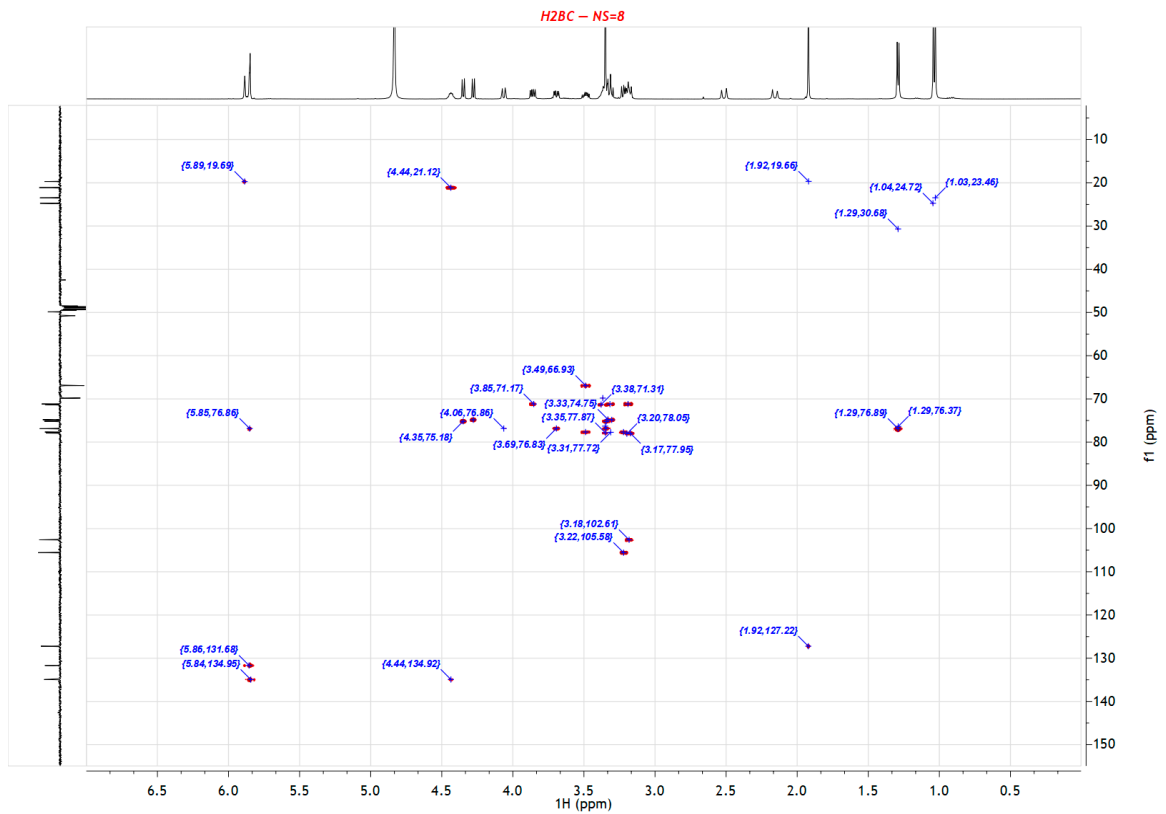

Figure S13.  $^1\text{H}$ - $^{13}\text{C}$  H2BC NMR (500 MHz) spectrum of pinnatifidoside D, in MeOH- $d_4$ , 25 °C.

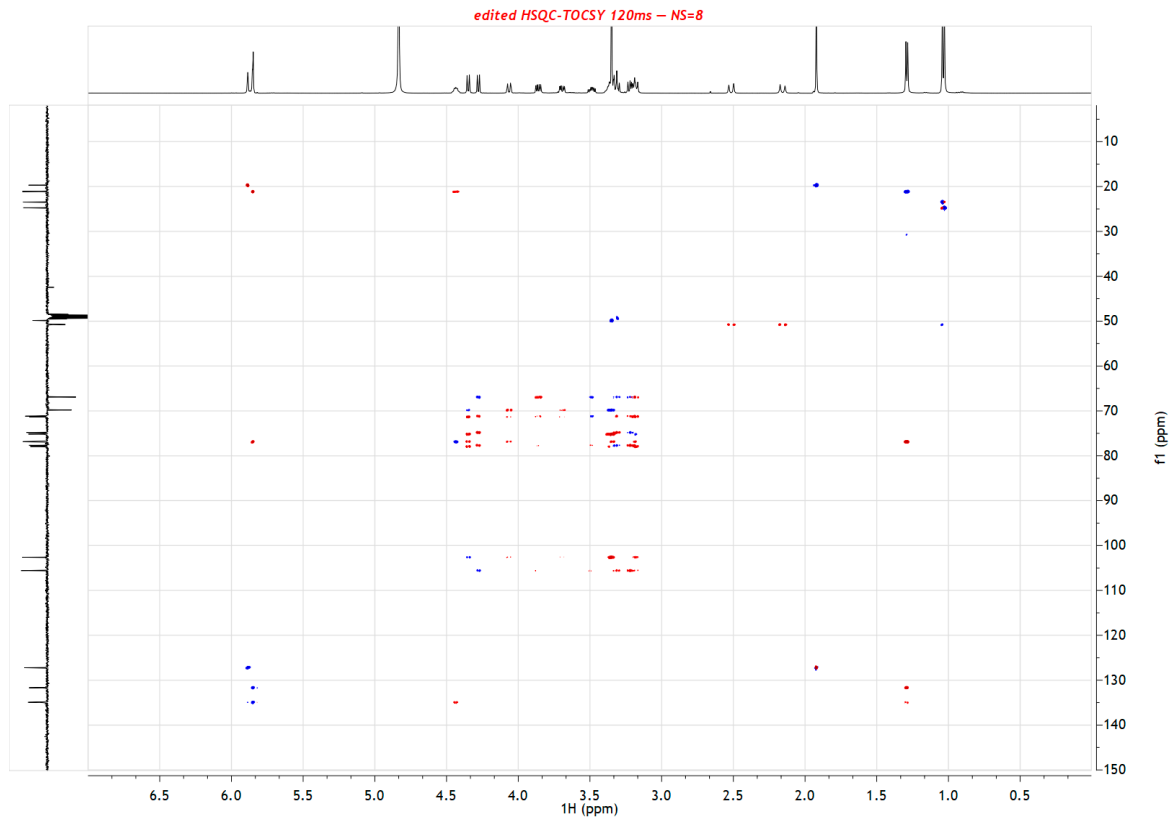

Figure S14.  $^1\text{H}$ - $^{13}\text{C}$  HSQC-TOCSY NMR (500 MHz) spectrum of pinnatifidanoside D, in  $\text{MeOH-d}_4$ , 25 °C.

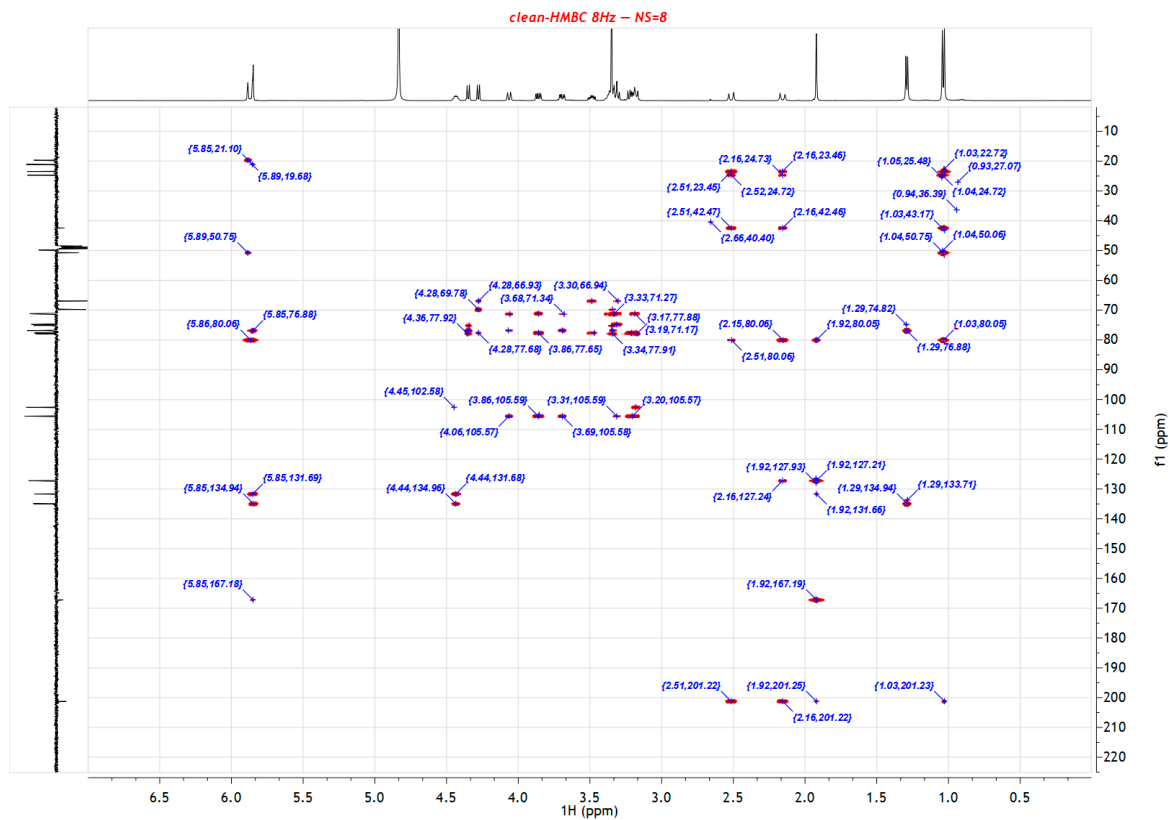

Figure S15.  $^1\text{H}$ - $^{13}\text{C}$  HMBC NMR (500 MHz) spectrum of pinnatifidanoside D, in  $\text{MeOH-d}_4$ , 25 °C.



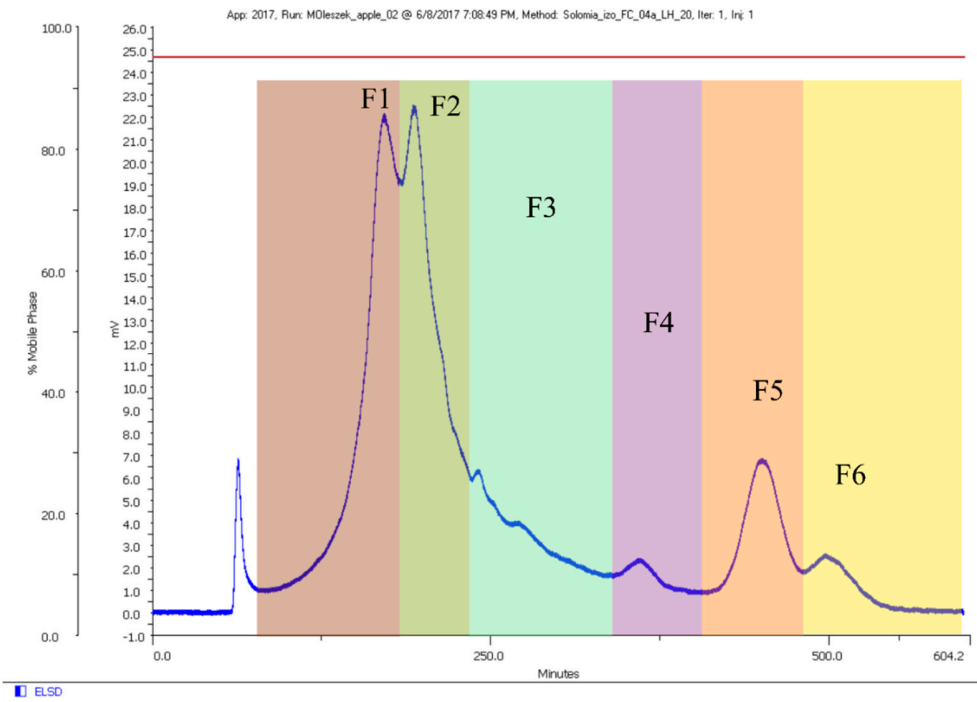

Figure S16. LH-20 chromatogram of plant specific metabolites fraction from apple pomace.
